# Supplementary material for: Systematic analysis and prediction of genes associated with monogenic disorders on human chromosome X
Source: PubMed Central journal article supplement (PMC9630267; doi:10.1038/s41467-022-34264-y), 2022-11-02
Supplement: 41467_2022_34264_MOESM3_ESM.pdf [file 41467_2022_34264_MOESM3_ESM.pdf]

## Description of Additional Supplementary Files

**Supplementary Data 1-11.** Excel file containing Supplementary Data 1-11 in individual sheets:

**Supplementary Data 1.** Gene set definitions

**Supplementary Data 2.** Annotations of protein-coding genes on chrX

**Supplementary Data 3.** Terms/sentences used as synonymous in the OMIM Advanced Search

**Supplementary Data 4.** Gene annotations for autosomes and sex chromosomes

**Supplementary Data 5.** Description of data columns on Supplementary Table 6 relative to the machine learning classifiers

**Supplementary Data 6.** Data related to the machine learning classifiers

**Supplementary Data 7.** Characteristics of the 25 machine learning models

**Supplementary Data 8.** Reported mutations in no-disorder and PMT genes and presence in NDD gene lists

**Supplementary Data 9.** Number of damaging variants (truncating or CADD $\geq$ 25) in two published studies and two additional cohorts of patients with developmental disorders

**Supplementary Data 10.** Damaging variants (truncating or CADD $\geq$ 25) in 13 selected genes

**Supplementary Data 11.** Damaging variants (truncating or CADD $\geq$ 25) in CDK16 and TRPC5
